# Supplementary material for: Immunomodulatory properties of hempseed oligopeptides in an LRRK2-associated Parkinson's disease animal model
Source: Royal Society of Chemistry journal article supplement (doi:10.1039/d4fo03167a), 2024-01-01
Supplement: d4fo03167a1.pdf [file d4fo03167a1.pdf]

1 **Supplementary material - Table 1.** Chemical composition of hemp seeds, protein isolate (HPI), and the HPH60A+15F. The data is expressed as grams per 100 grams  
2 of dry weight and shows the mean  $\pm$  standard deviation of three determinations.

| <b>Proximate composition (g/100 g of product)</b> | <b>Seeds</b>   | <b>HPI</b>     | <b>HPH60A+15F</b> |
|---------------------------------------------------|----------------|----------------|-------------------|
| <b>Ash</b>                                        | 5.0 $\pm$ 0.0  | 1.0 $\pm$ 0.1  | 10.1 $\pm$ 0.3    |
| <b>Proteins</b>                                   | 23.8 $\pm$ 1.0 | 96.4 $\pm$ 0.9 | 82.3 $\pm$ 0.0    |
| <b>Fat</b>                                        | 31.8 $\pm$ 0.5 | 0.2 $\pm$ 0.0  | ND                |
| <b>Fibre</b>                                      | 29.3 $\pm$ 1.4 | ND             | ND                |
| <b>Polyphenols</b>                                | 0.3 $\pm$ 0.0  | 0.0 $\pm$ 0.0  | ND                |
| <b>Soluble sugars</b>                             | 5.1 $\pm$ 1.0  | ND             | ND                |

3 ND: not determined.

4

5

6

7

8

**Supplementary material - Table 2.** Amino acid composition of hemp protein isolate (HPI) and the HPH60A+15F. The data, expressed as milligrams of amino acids per grams of total protein, are the mean  $\pm$  standard deviation of three determinations.

|                                        | HPI             | HPH60A+15F      | 2007<br>FAO/WHO/UNU<br>a,b |
|----------------------------------------|-----------------|-----------------|----------------------------|
| Histidine                              | 28.6 $\pm$ 0.2  | 27.7 $\pm$ 0.1  | 15                         |
| Isoleucine                             | 23.8 $\pm$ 0.0  | 39.2 $\pm$ 0.7  | 30                         |
| Leucine                                | 62.9 $\pm$ 0.4  | 64.6 $\pm$ 0.9  | 59                         |
| Lysine                                 | 29.2 $\pm$ 0.2  | 33.4 $\pm$ 0.4  | 45                         |
| Methionine + Cysteine                  | 29.6 $\pm$ 6.6  | 25.0 $\pm$ 0.7  | 22                         |
| Methionine                             | 17.9 $\pm$ 6.2  | 18.5 $\pm$ 0.4  | 16                         |
| Cysteine                               | 11.7 $\pm$ 0.3  | 6.6 $\pm$ 0.3   | 6                          |
| Phenylalanine + Tyrosine               | 78.7 $\pm$ 0.7  | 80.3 $\pm$ 1.2  | 38                         |
| Threonine                              | 34.1 $\pm$ 0.4  | 34.4 $\pm$ 0.5  | 23                         |
| Tryptophan                             | 11.9 $\pm$ 0.2  | 11.1 $\pm$ 0.5  | 6                          |
| Valine                                 | 34.8 $\pm$ 1.1  | 42.6 $\pm$ 1.0  | 39                         |
| <i>Total essential amino acids</i>     | 363.2           | 383.3           | 277                        |
| Aspartic acid                          | 151.7 $\pm$ 0.8 | 146.1 $\pm$ 1.7 |                            |
| Glutamic acid                          | 194.2 $\pm$ 1.7 | 189.8 $\pm$ 3.6 |                            |
| Serine                                 | 59.6 $\pm$ 0.4  | 54.1 $\pm$ 0.8  |                            |
| Glycine                                | 40.1 $\pm$ 0.2  | 36.9 $\pm$ 1.0  |                            |
| Arginine                               | 126.5 $\pm$ 0.9 | 131.6 $\pm$ 1.6 |                            |
| Alanine                                | 47.6 $\pm$ 0.4  | 44.7 $\pm$ 1.0  |                            |
| Proline                                | 58.6 $\pm$ 10.7 | 28.8 $\pm$ 0.4  |                            |
| <i>Total non-essential amino acids</i> | 678.2           | 632.1           |                            |

<sup>a</sup> FAO/WHO/UNU. Protein requirement mg/g score pattern in adults. <sup>b</sup> FAO and FINUT 2017. Evaluation of the quality of dietary protein in human nutrition. FAO Food and Nutrition Document NO. 92.

**Supplementary material – Table 3.** Sequences of the designed oligonucleotides

| <b>Gene</b>   | <b>Accession Number</b> | <b>Sequence</b>       |
|---------------|-------------------------|-----------------------|
| GAPDH         | NM_001411845.1          | ATGGCGTTGTGAGGTGCATA  |
|               |                         | ACTGTGCCGTTGAATTTGCC  |
| TNF- $\alpha$ | NM_013693.3             | CACAGAAAGCATGATCCGCG  |
|               |                         | ACTGATGAGAGGGAGGCCAT  |
| IL-1 $\beta$  | NM_008361.4             | GTCGCTCAGGGTCACAAGAA  |
|               |                         | CCACACGTTGACAGCTAGGT  |
| IL-6          | NM_031168.2             | ACTGGGGATGTCTGTAGCTCA |
|               |                         | CTGTGAAGTCTCCTCTCCGG  |
| IL-10         | NM_010548.2             | CCTGGTAGAAGTGATGCCCC  |
|               |                         | GCTCCACTGCCTTGCTCTTA  |
| iNOS          | NM_010927.4             | CTGCAGCACTTGGATCAGGA  |
|               |                         | GCCAGAAACTTCGGAAGGGA  |

**Supplementary material – Table 4.** Characterization of the peptide sequence identified in the neuroHPH60A+15F based on *in silico* analyses.

| PEPTIDE         | PRE AIP <sup>1</sup> | PEPTIDE RANKER (THRESHOLD 0.5) <sup>2</sup> | PRETP-STACK - ANTI-INFLAMMATORY (THRESHOLD 0.5) <sup>3</sup> | ANOX PRED (FRS) <sup>4</sup> | ANOX PRED (CHEL) <sup>4</sup> | SCMB3 PP (THRESHOLD 749) <sup>5</sup> | HYDROPHOBICITY <sup>6</sup> | STERIC HINDRANCE <sup>6</sup> | WATER SOLUBILITY <sup>6</sup> | PI <sup>6</sup> | CHARGE <sup>6</sup> | AMPHIPHATICITY <sup>6</sup> | SELF-AGGREGATION-PRONE REGION & AMYLOIDS <sup>7</sup> | DISORDER PROBABILITY (%) <sup>7</sup> | A-HEXILIX <sup>7</sup> | B-STRAND <sup>7</sup> | COIL <sup>7</sup> |
|-----------------|----------------------|---------------------------------------------|--------------------------------------------------------------|------------------------------|-------------------------------|---------------------------------------|-----------------------------|-------------------------------|-------------------------------|-----------------|---------------------|-----------------------------|-------------------------------------------------------|---------------------------------------|------------------------|-----------------------|-------------------|
| EDTEEHLR        | 0.323                | 0.094357                                    | 0.473                                                        | 0.48542848                   | 0.26215655                    | 725.5                                 | -0,53                       | 0,5                           | Good                          | 4,81            | -2                  | 1,02                        | 4 - 7 (NI)                                            | 100                                   | 33.33                  | -                     | 66.67             |
| LPHAPNFK        | 0.504                | 0.83981                                     | 0.589                                                        | 0.53182054                   | 0.31723848                    | 808.5                                 | -0,11                       | 0,47                          | Poor                          | 9,11            | 1,5                 | 0,57                        | 5 - 8 (NI)                                            | 100                                   | -                      | -                     | 100               |
| STTTGHLLYK      | 0.404                | 0.128232                                    | 0.482                                                        | 0.47871155                   | 0.24595422                    | 778.89                                | -0,11                       | 0,52                          | Poor                          | 8,94            | 1,5                 | 0,51                        | 6 - 9 (NI)                                            | 100                                   | -                      | 10.00                 | 90.00             |
| YYKVVLDVK       | 0.373                | 0.0828702                                   | 0.512                                                        | 0.31042                      | 0.14705                       | 705.75                                | -0,08                       | 0,68                          | Good                          | 8,76            | 1                   | 0,82                        | 4 - 8 (PA)                                            | 100                                   | -                      | 55.56                 | 44.44             |
| YVNGPKLLY       | 0.429                | 0.359528                                    | 0.575                                                        | 0.4628036                    | 0.20888114                    | 725.38                                | 0                           | 0,63                          | Poor                          | 8,83            | 1                   | 0,41                        | 6 - 9 (NI)                                            | 100                                   | -                      | -                     | 100               |
| LGAQVYHNLK      | 0.435                | 0.36153                                     | 0.583                                                        | 0.56095952                   | 0.21302354                    | 766.11                                | -0,08                       | 0,58                          | Poor                          | 8,94            | 1,5                 | 0,64                        | 5 - 9 (NI)                                            | 100                                   | 40.00                  | -                     | 60.00             |
| ESYSLYVYK       | 0.428                | 0.246647                                    | 0.522                                                        | 0.49872723                   | 0.19270                       | 796.25                                | -0,12                       | 0,64                          | Poor                          | 6,34            | 0                   | 0,55                        | 5 - 8 (NI)                                            | 100                                   | -                      | 55.56                 | 44.44             |
| MVNHFLAEFK      | 0.402                | 0.38354                                     | 0.556                                                        | 0.45329586                   | 0.250027                      | 718.78                                | 0                           | 0,61                          | Poor                          | 7,1             | 0,5                 | 0,64                        | 1 - 6 (NI)                                            | 100                                   | 60.00                  | -                     | 40.00             |
| ESYSVYVKY       | 0.417                | 0.193184                                    | 0.596                                                        | 0.45912769                   | 0.17650                       | 788.25                                | -0,12                       | 0,66                          | Poor                          | 6,34            | 0                   | 0,55                        | 3 - 9 (NI)                                            | 100                                   | -                      | 55.56                 | 44.44             |
| EHALLAYTLRK     | 0.511                | 0.353369                                    | 0.59                                                         | 0.40344498                   | 0.2267179                     | 747.8                                 | -0,18                       | 0,54                          | Good                          | 8,94            | 1,5                 | 0,8                         | 4 - 9 (NI)                                            | 100                                   | 54.55                  | -                     | 45.45             |
| YSNSPKLLY       | 0.396                | 0.439579                                    | 0.567                                                        | 0.38785547                   | 0.22962452                    | 750.88                                | -0,14                       | 0,59                          | Poor                          | 8,83            | 1                   | 0,41                        | 6 - 9 (NI)                                            | 100                                   | -                      | -                     | 100               |
| AAQLGSVTESLQACK | 0.588                | 0.398503                                    | 0.579                                                        | 0.35740                      | 0.17118                       | 766.27                                | -0,06                       | 0,59                          | Poor                          | 6,32            | 0                   | 0,46                        | 8 - 12 (NI)                                           | 100                                   | 81.25                  | -                     | 18.75             |
| AAEDDEDDNVDKT   | 0.365                | 0.0962144                                   | 0.437                                                        | 0.33948                      | 0.22220206                    | 740.83                                | -0,44                       | 0,68                          | Good                          | 3,58            | -6                  | 0,48                        | 10 - 13 (NI)                                          | 100                                   | -                      | -                     | 100               |
| HTLNQLDSVK      | 0.433                | 0.0625703                                   | 0.46                                                         | 0.32810                      | 0.20691                       | 767.33                                | -0,24                       | 0,57                          | Good                          | 7,09            | 0,5                 | 0,64                        | 1 - 4 (NI)                                            | 100                                   | 40.00                  | -                     | 60.00             |
| VPANVSVVEVTRC   | 0.536                | 0.147527                                    | 0.567                                                        | 0.35154                      | 0.15323                       | 735.46                                | -0,05                       | 0,62                          | Poor                          | 6,32            | 0                   | 0,27                        | 6 - 9 (PA)                                            | 100                                   | -                      | 50.00                 | 50.00             |
| LNNPSNSDLFNPR   | 0.403                | 0.563255                                    | 0.474                                                        | 0.35878                      | 0.2190536                     | 783.33                                | -0,31                       | 0,62                          | Good                          | 6,19            | 0                   | 0,19                        | 8 - 11 (NI)                                           | 100                                   | -                      | -                     | 100               |

|                               |           |           |       |                |                |        |       |      |      |               |      |      |                 |     |           |       |           |
|-------------------------------|-----------|-----------|-------|----------------|----------------|--------|-------|------|------|---------------|------|------|-----------------|-----|-----------|-------|-----------|
| <b>FEDENFLK</b>               | 0.45<br>3 | 0.564802  | 0.639 | 0.3969<br>0238 | 0.2450<br>5743 | 775.5  | -0,16 | 0,67 | Good | 4,<br>14      | -2   | 0,69 | 5 - 8 (NI)      | 100 | -         | -     | 100       |
| <b>EAESCNCLOQ<br/>FQLTH</b>   | 0.40<br>4 | 0.519936  | 0.514 | 0.4102<br>7448 | 0.2439<br>9231 | 773.21 | -0,13 | 0,58 | Poor | 4,<br>51      | -1,5 | 0,43 | 5 - 8 (NI)      | 100 | -         | -     | 100       |
| <b>VNRTWLPL</b>               | 0.40<br>1 | 0.623818  | 0.564 | 0.4755<br>2571 | 0.1957<br>5    | 724.71 | -0,08 | 0,57 | Poor | 10<br>,1<br>1 | 1    | 0,31 | 1 - 6 (NI)      | 100 | -         | -     | 100       |
| <b>LLSSVYDNEF<br/>GYSRN</b>   | 0.31<br>6 | 0.281731  | 0.426 | 0.4547<br>9041 | 0.1723<br>0    | 745.5  | -0,18 | 0,65 | Good | 4,<br>38      | -1   | 0,25 | 1 - 6 (NI)      | 100 | -         | -     | 100       |
| <b>LLSWYNNEFG<br/>YSGGR</b>   | 0.32<br>4 | 0.552753  | 0.517 | 0.4432<br>3766 | 0.1705<br>6    | 790.43 | -0,11 | 0,64 | Poor | 6,<br>35      | 0    | 0,25 | 1 - 5 (NI)      | 100 | 6.67      | -     | 93.<br>33 |
| <b>FEQLCSDRLF</b>             | 0.57<br>3 | 0.749277  | 0.56  | 0.3556<br>2    | 0.2269<br>246  | 770.89 | -0,17 | 0,64 | Good | 4,<br>38      | -1   | 0,5  | 1 - 5 (NI)      | 100 | 40.0<br>0 | -     | 60.<br>00 |
| <b>NAKGSFVKLL</b>             | 0.42<br>8 | 0.507923  | 0.52  | 0.3182<br>7    | 0.2000<br>3    | 718.33 | -0,05 | 0,63 | Good | 10<br>,0<br>2 | 2    | 0,73 | 6 - 10 (NI)     | 100 | -         | 30.00 | 70.<br>00 |
| <b>MKLAGSNPQ<br/>QQQSF</b>    | 0.42<br>0 | 0.218761  | 0.451 | 0.4533<br>5084 | 0.3028<br>6241 | 764.85 | -0,23 | 0,63 | Poor | 9,<br>11      | 1    | 0,62 | 11 - 14<br>(NI) | 100 | 28.5<br>7 | -     | 71.<br>43 |
| <b>AAEDDEDDV<br/>DKT</b>      | 0.37<br>1 | 0.0854395 | 0.444 | 0.3200<br>2    | 0.2078<br>0484 | 756.67 | -0,45 | 0,68 | Good | 3,<br>51      | -7   | 0,48 | 10 - 13<br>(NI) | 100 | -         | -     | 100       |
| <b>EKGVLLVGPN</b>             | 0.42<br>0 | 0.227924  | 0.568 | 0.3433<br>9    | 0.1942<br>2    | 758.0  | 0     | 0,63 | Good | 6,<br>35      | 0    | 0,49 | 4 - 7 (PA)      | 100 | -         | 40.00 | 60.<br>00 |
| <b>LLSNASCCTN<br/>CLAPLAK</b> | 0.61<br>7 | 0.361523  | 0.572 | 0.3296<br>9    | 0.2133<br>5886 | 785.06 | -0,02 | 0,56 | Poor | 8,<br>38      | 1    | 0,22 | 7 - 11 (NI)     | 100 | 17.6<br>5 | -     | 82.<br>35 |
| <b>NGPENQFRQQ</b>             | 0.49<br>2 | 0.223412  | 0.508 | 0.4086<br>8723 | 0.2607<br>8859 | 792.78 | -0,5  | 0,67 | Good | 6,<br>36      | 0    | 0,75 | 6 - 9 (NI)      | 100 | 30.0<br>0 | -     | 70.<br>00 |
| <b>VNRLTEGPLL</b>             | 0.46<br>4 | 0.220706  | 0.595 | 0.4457<br>8308 | 0.2436<br>1433 | 735.11 | -0,1  | 0,6  | Good | 6,<br>36      | 0    | 0,37 | 1 - 5 (NI)      | 100 | -         | -     | 100       |
| <b>LRPHWNLN</b>               | 0.50<br>1 | 0.610303  | 0.563 | 0.5228<br>9259 | 0.2806<br>2597 | 785.86 | -0,26 | 0,52 | Poor | 10<br>,1<br>1 | 1,5  | 0,49 | 5 - 8 (NI)      | 100 | -         | -     | 100       |
| <b>LGMFDLHYC<br/>DK</b>       | 0.52<br>2 | 0.577749  | 0.528 | 0.5376<br>063  | 0.2354<br>2656 | 782.2  | -0,07 | 0,61 | Good | 5,<br>22      | -0,5 | 0,47 | 3 - 9 (NI)      | 100 | -         | -     | 100       |
| <b>NNNFGPGPGS<br/>NFR</b>     | 0.45<br>6 | 0.645374  | 0.542 | 0.5095<br>1195 | 0.2468<br>3063 | 797.58 | -0,23 | 0,65 | Poor | 10<br>,1<br>1 | 1    | 0,19 | 1 - 4 (NI)      | 100 | -         | -     | 100       |
| <b>ELKRLVGPN</b>              | 0.46<br>4 | 0.141099  | 0.617 | 0.3157<br>9    | 0.1741<br>5    | 766.5  | -0,27 | 0,62 | Good | 9,<br>1       | 1    | 0,82 | 2 - 6 (NI)      | 100 | 11.1<br>1 | -     | 88.<br>89 |
| <b>QNGQFSVLFT<br/>K</b>       | 0.41<br>2 | 0.547261  | 0.503 | 0.2989<br>0    | 0.1918<br>0    | 716.2  | -0,1  | 0,65 | Poor | 9,<br>11      | 1    | 0,56 | 5 - 10 (NI)     | 100 | -         | 45.45 | 54.<br>55 |
| <b>NLNNPSSDDL<br/>FNPR</b>    | 0.37<br>7 | 0.486181  | 0.509 | 0.3318<br>6    | 0.2059<br>0182 | 783.92 | -0,34 | 0,63 | Good | 4,<br>21      | -1   | 0,18 | 1 - 4 (NI)      | 100 | -         | -     | 100       |
| <b>GNPEDEFRGA<br/>Q</b>       | 0.34<br>1 | 0.397282  | 0.526 | 0.3656<br>0    | 0.2166<br>6835 | 780.1  | -0,36 | 0,65 | Good | 4,<br>14      | -2   | 0,57 | 6 - 9 (NI)      | 100 | 36.3<br>6 | -     | 63.<br>64 |
| <b>LVDTFLEDKV</b>             | 0.40<br>4 | 0.116838  | 0.561 | 0.3291<br>9    | 0.2252<br>5312 | 795.89 | -0,06 | 0,66 | Good | 4,<br>03      | -2   | 0,49 | 1 - 6 (NI)      | 100 | 50.0<br>0 | -     | 50.<br>00 |

|                               |           |           |       |                |                |        |       |      |      |               |      |      |                 |       |           |       |           |
|-------------------------------|-----------|-----------|-------|----------------|----------------|--------|-------|------|------|---------------|------|------|-----------------|-------|-----------|-------|-----------|
| <b>ALQPDNRLO</b>              | 0.38<br>9 | 0.319923  | 0.593 | 0.4000<br>5091 | 0.2682<br>5362 | 759.62 | -0,36 | 0,61 | Good | 6,<br>19      | 0    | 0,55 | 6 - 9 (NI)      | 100   | -         | -     | 100       |
| <b>SYELPDGKVL<br/>TLGNNGN</b> | 0.50<br>5 | 0.465178  | 0.518 | 0.2816<br>3    | 0.2816<br>3    | 778.94 | -0,13 | 0,64 | Good | 4,<br>38      | -1   | 0,29 | 9 - 12 (NI)     | 100   | -         | 23.53 | 76.<br>47 |
| <b>DPVQEAWAE<br/>NVDLVG</b>   | 0.33<br>1 | 0.296177  | 0.463 | 0.4171<br>3649 | 0.2225<br>2923 | 769.0  | -0,06 | 0,64 | Good | 3,<br>44      | -4   | 0,25 | 11 - 14<br>(NI) | 100   | 73.3<br>3 | -     | 26.<br>67 |
| <b>TVTAMNVVY<br/>ALK</b>      | 0.44<br>9 | 0.0810588 | 0.566 | 0.3857<br>1241 | 0.1942<br>7    | 701.82 | 0,07  | 0,64 | Poor | 8,<br>94      | 1    | 0,31 | 1 - 11 (PA)     | 66.66 | 58.3<br>3 | -     | 41.<br>67 |
| <b>YSNSKPLLY</b>              | 0.39<br>7 | 0.471727  | 0.57  | 0.3828<br>1673 | 0.2083<br>0171 | 772.12 | -0,14 | 0,59 | Poor | 8,<br>83      | 1    | 0,41 | 6 - 9 (NI)      | 100   | -         | -     | 100       |
| <b>LEVLELSSTD<br/>L</b>       | 0.53<br>5 | 0.0788546 | 0.497 | 0.2842<br>2    | 0.2360<br>5816 | 738.8  | 0     | 0,59 | Good | 3,<br>58      | -3   | 0,23 | 1 - 4 (NI)      | 100   | -         | 36.36 | 63.<br>64 |
| <b>VLTAVNEEAL<br/>STRA</b>    | 0.49<br>8 | 0.0989727 | 0.597 | 0.3806<br>2662 | 0.1731<br>8    | 760.62 | -0,1  | 0,6  | Good | 4,<br>54      | -1   | 0,3  | 1 - 5 (NI)      | 100   | 35.7<br>1 | -     | 64.<br>29 |
| <b>SLTAMNVVYA<br/>LK</b>      | 0.51<br>2 | 0.213545  | 0.608 | 0.3666<br>5452 | 0.1871<br>9    | 703.73 | 0,06  | 0,62 | Poor | 8,<br>94      | 1    | 0,31 | 2 - 11 (PA)     | 100   | 58.3<br>3 | -     | 41.<br>67 |
| <b>QELSNLDDAV<br/>R</b>       | 0.44<br>0 | 0.131161  | 0.511 | 0.2892<br>1    | 0.2189<br>7164 | 804.0  | -0,32 | 0,65 | Good | 4,<br>03      | -2   | 0,45 | 3 - 6 (NI)      | 100   | 54.5<br>5 | -     | 45.<br>45 |
| <b>ESTLHLVLR</b>              | 0.45<br>2 | 0.234661  | 0.601 | 0.4112<br>438  | 0.2476<br>9832 | 784.38 | -0,12 | 0,52 | Good | 7,<br>1       | 0,5  | 0,57 | 3 - 8 (NI)      | 100   | -         | 55.56 | 44.<br>44 |
| <b>NDYFSNFSGV<br/>YSQDK</b>   | 0.44<br>3 | 0.263269  | 0.454 | 0.4323<br>9525 | 0.2298<br>6418 | 788.4  | -0,17 | 0,67 | Poor | 4,<br>21      | -1   | 0,31 | 3 - 11 (NI)     | 100   | 56.2<br>5 | -     | 43.<br>75 |
| <b>VVDENGNSVF<br/>DSGGVV</b>  | 0.43<br>2 | 0.208917  | 0.447 | 0.2854<br>8    | 0.1560<br>1    | 793.07 | 0     | 0,69 | Good | 3,<br>5       | -3   | 0,08 | 7 - 10 (NI)     | 100   | -         | -     | 100       |
| <b>DAVYTEHAK</b>              | 0.46<br>7 | 0.0723056 | 0.701 | 0.4850<br>3625 | 0.1929<br>9    | 789.11 | -0,21 | 0,56 | Good | 5,<br>33      | -0,5 | 0,64 | 3 - 6 (NI)      | 100   | -         | -     | 100       |
| <b>SLGGGTGSG<br/>MASLLSK</b>  | 0.68<br>2 | 0.687913  | 0.618 | 0.4102<br>9149 | 0.2144<br>5607 | 779.5  | 0,07  | 0,6  | Poor | 9,<br>11      | 1    | 0,22 | 13 - 16<br>(NI) | 100   | 52.9<br>4 | -     | 47.<br>06 |
| <b>VVTGVANLAA<br/>HR</b>      | 0.42<br>5 | 0.113075  | 0.483 | 0.3828<br>8996 | 0.2063<br>3644 | 772.0  | 0,01  | 0,57 | Poor | 10,<br>1<br>1 | 1,5  | 0,33 | 1 - 8 (NI)      | 100   | 50.0<br>0 | -     | 50.<br>00 |
| <b>ASALDSPPVL<br/>KT</b>      | 0.40<br>3 | 0.359592  | 0.608 | 0.4564<br>3193 | 0.2521<br>0443 | 756.09 | -0,05 | 0,55 | Good | 6,<br>19      | 0    | 0,31 | 9 - 12 (NI)     | 100   | -         | -     | 100       |
| <b>LAQANGWGV<br/>MVSHR</b>    | 0.52<br>3 | 0.480854  | 0.498 | 0.5148<br>2069 | 0.1497<br>2    | 779.77 | -0,05 | 0,59 | Poor | 10,<br>1<br>1 | 1,5  | 0,37 | 7 - 11 (NI)     | 100   | -         | 35.71 | 64.<br>29 |
| <b>ETVHKLNSS</b>              | 0.35<br>8 | 0.0461699 | 0.443 | 0.3217<br>9    | 0.2277<br>4638 | 703.78 | -0,3  | 0,57 | Good | 7,<br>1       | 0,5  | 0,64 | 1 - 5 (NI)      | 100   | 30.0<br>0 | -     | 70.<br>00 |
| <b>ELTALAPSTM<br/>K</b>       | 0.48<br>9 | 0.239017  | 0.521 | 0.3288<br>6    | 0.2385<br>2357 | 772.1  | -0,05 | 0,56 | Good | 6,<br>35      | 0    | 0,45 | 2 - 5 (NI)      | 100   | -         | -     | 100       |
| <b>LHPFAAHL</b>               | 0.54<br>6 | 0.728657  | 0.584 | 0.4774<br>946  | 0.2961<br>0017 | 793.75 | 0,2   | 0,41 | Poor | 7,<br>26      | 1    | 0,32 | 4 - 9 (NI)      | 100   | 55.5<br>6 | -     | 44.<br>44 |
| <b>LWYGFQNAL<br/>LAAL</b>     | 0.60<br>6 | 0.606177  | 0.5   | 0.4056<br>8617 | 0.2108<br>9363 | 753.75 | 0,21  | 0,59 | Poor | 5,<br>88      | 0    | 0,1  | 1 - 5 (NI)      | 100   | 76.9<br>2 | -     | 23.<br>08 |
| <b>YASSANLHLP<br/>K</b>       | 0.43<br>1 | 0.400494  | 0.473 | 0.4024<br>2538 | 0.2371<br>0489 | 736.3  | -0,1  | 0,51 | Poor | 8,<br>94      | 1,5  | 0,47 | 6 - 9 (NI)      | 100   | -         | -     | 100       |

|                         |           |           |       |                |                |        |       |      |      |               |      |      |                 |       |           |       |           |
|-------------------------|-----------|-----------|-------|----------------|----------------|--------|-------|------|------|---------------|------|------|-----------------|-------|-----------|-------|-----------|
| AGVLQSYAVA<br>EKV       | 0.39<br>2 | 0.125511  | 0.552 | 0.4353<br>3882 | 0.1685<br>1    | 800.42 | 0,03  | 0,63 | Poor | 6,<br>35      | 0    | 0,48 | 3 - 9 (NI)      | 100   | 69.2<br>3 | -     | 30.<br>77 |
| SYSPYDMLEV<br>EK        | 0.42<br>2 | 0.16464   | 0.541 | 0.4321<br>6446 | 0.1866<br>0    | 750.55 | -0,19 | 0,64 | Good | 4,<br>14      | -2   | 0,52 | 7 - 10 (NI)     | 100   | 33.3<br>3 | -     | 66.<br>67 |
| FNADQFQVM<br>VAAAD      | 0.47<br>6 | 0.215165  | 0.47  | 0.3540<br>0    | 0.2024<br>1    | 778.54 | 0,01  | 0,66 | Poor | 3,<br>57      | -2   | 0,18 | 8 - 11 (NI)     | 100   | 71.4<br>3 | -     | 28.<br>57 |
| VSFELFAGSV              | 0.49<br>4 | 0.329438  | 0.593 | 0.4030<br>8008 | 0.2437<br>4738 | 805.0  | 0,21  | 0,63 | Poor | 4             | -1   | 0,13 | 1 - 5 (NI)      | 100   | -         | 40.00 | 60.<br>00 |
| SLGGGTGSG<br>MGTL LLSK  | 0.62<br>4 | 0.509696  | 0.672 | 0.4504<br>2118 | 0.2013<br>0    | 792.25 | 0,06  | 0,61 | Poor | 9,<br>11      | 1    | 0,22 | 12 - 15<br>(NI) | 100   | 35.2<br>9 | -     | 64.<br>71 |
| VFVPLDLNV               | 0.38<br>8 | 0.279804  | 0.463 | 0.4050<br>0674 | 0.2294<br>3987 | 760.88 | 0,21  | 0,64 | Poor | 3,<br>8       | -1   | 0    | 1 - 9 (NI)      | 100   | -         | -     | 100       |
| LSELEAALGN<br>L         | 0.48<br>3 | 0.266984  | 0.558 | 0.3448<br>9    | 0.2541<br>6312 | 760.7  | 0,06  | 0,59 | Good | 3,<br>8       | -2   | 0,23 | 8 - 11 (NI)     | 100   | 54.5<br>5 | -     | 45.<br>45 |
| QHALLAYTLG<br>VK        | 0.49<br>5 | 0.328109  | 0.554 | 0.4381<br>7875 | 0.1896<br>9    | 744.73 | 0,04  | 0,55 | Poor | 8,<br>94      | 1,5  | 0,53 | 4 - 11 (NI)     | 50.00 | 33.3<br>3 | 8.33  | 58.<br>33 |
| KTPHVNVGTL<br>GHVDHKG   | 0.51<br>2 | 0.124409  | 0.494 | 0.4284<br>9854 | 0.2162<br>4123 | 715.0  | -0,15 | 0,53 | Good | 8,<br>94      | 2,5  | 0,69 | 5 - 13 (NI)     | 100   | -         | -     | 100       |
| YLSPDQLADL<br>KY        | 0.42<br>8 | 0.233407  | 0.492 | 0.3492<br>0    | 0.2373<br>8429 | 740.45 | -0,14 | 0,61 | Good | 4,<br>21      | -1   | 0,41 | 7 - 10 (NI)     | 100   | 50.0<br>0 | -     | 50.<br>00 |
| EPLPEDEE<br>KE          | 0.51<br>1 | 0.0875933 | 0.46  | 0.4316<br>5615 | 0.2452<br>0122 | 799.64 | -0,39 | 0,61 | Good | 3,<br>77      | -6   | 0,94 | 9 - 12 (NI)     | 100   | -         | -     | 100       |
| YFAPHQHQH               | 0.35<br>3 | 0.296796  | 0.485 | 0.5661<br>1812 | 0.3127<br>6613 | 835.25 | -0,2  | 0,4  | Poor | 7,<br>35      | 1,5  | 0,76 | 5 - 9 (NI)      | 100   | -         | -     | 100       |
| LVQAFAGFTD<br>K         | 0.42<br>0 | 0.315678  | 0.592 | 0.3760<br>7    | 0.2147<br>1    | 849.0  | 0,02  | 0,64 | Poor | 6,<br>19      | 0    | 0,45 | 1 - 5 (NI)      | 100   | 36.3<br>6 | -     | 63.<br>64 |
| LEVLELMDTR              | 0.54<br>8 | 0.110758  | 0.548 | 0.3329<br>5    | 0.2147<br>5784 | 775.22 | -0,15 | 0,64 | Good | 4,<br>14      | -2   | 0,5  | 3 - 7 (NI)      | 100   | 50.0<br>0 | -     | 50.<br>00 |
| LPFPLDDGV               | 0.40<br>8 | 0.582772  | 0.464 | 0.3785<br>1363 | 0.2396<br>5934 | 783.0  | 0,13  | 0,59 | Poor | 3,<br>57      | -2   | 0    | 5 - 10 (NI)     | 100   | -         | -     | 100       |
| PMCVESFSDY<br>PPLGR     | 0.43<br>5 | 0.581146  | 0.503 | 0.4074<br>2454 | 0.2251<br>8964 | 753.93 | -0,11 | 0,6  | Good | 4,<br>38      | -1   | 0,25 | 3 - 8 (NI)      | 100   | -         | -     | 100       |
| SYELPNGQVL<br>TLLNDN    | 0.54<br>7 | 0.281871  | 0.467 | 0.3474<br>7    | 0.1732<br>9    | 778.33 | -0,1  | 0,63 | Poor | 3,<br>67      | -2   | 0,16 | 9 - 13 (NI)     | 100   | -         | 31.25 | 68.<br>75 |
| YASSARAHLK<br>P         | 0.48<br>1 | 0.338073  | 0.558 | 0.4228<br>1002 | 0.2191<br>4421 | 696.9  | -0,23 | 0,51 | Good | 10,<br>0<br>1 | 2,5  | 0,69 | 6 - 9 (NI)      | 100   | 36.3<br>6 | -     | 63.<br>64 |
| DATNVGNQG<br>GFAPNLLFSH | 0.45<br>4 | 0.511472  | 0.492 | 0.4375<br>5394 | 0.2665<br>8848 | 808.17 | -0,02 | 0,6  | Poor | 5,<br>09      | -0,5 | 0,14 | 14 - 17<br>(NI) | 100   | -         | -     | 100       |
| WVTYTEHAK               | 0.49<br>8 | 0.0864708 | 0.624 | 0.5239<br>8872 | 0.1803<br>9    | 781.75 | -0,14 | 0,54 | Poor | 7,<br>1       | 0,5  | 0,71 | 1 - 5 (NI)      | 100   | -         | -     | 100       |
| LTLEVPHE<br>VELHAA      | 0.53<br>2 | 0.0560362 | 0.449 | 0.4601<br>6908 | 0.2628<br>195  | 747.07 | -0,04 | 0,51 | Good | 4,<br>73      | -2   | 0,5  | 1 - 4 (NI)      | 100   | -         | 37.50 | 62.<br>5  |
| MKLGKHLPL<br>QL         | 0.45<br>6 | 0.258417  | 0.46  | 0.4667<br>2148 | 0.2424<br>6329 | 742.6  | -0,18 | 0,56 | Good | 10,<br>0<br>2 | 2,5  | 0,91 | 5 - 8 (NI)      | 100   | -         | -     | 100       |

|                               |           |           |       |                |                |        |       |      |      |               |     |      |                 |       |           |       |           |
|-------------------------------|-----------|-----------|-------|----------------|----------------|--------|-------|------|------|---------------|-----|------|-----------------|-------|-----------|-------|-----------|
| <b>LYAPQVLRGN<br/>T</b>       | 0.47<br>0 | 0.27195   | 0.57  | 0.3482<br>3    | 0.1764<br>8    | 820.0  | -0,12 | 0,61 | Poor | 9,<br>1       | 1   | 0,34 | 5 - 8 (NI)      | 100   | -         | -     | 100       |
| <b>LDEDVLLVFP<br/>V</b>       | 0.42<br>5 | 0.364639  | 0.517 | 0.2464<br>2    | 0.2464<br>2254 | 786.7  | 0,15  | 0,63 | Good | 3,<br>5       | -3  | 0,12 | 5 - 9 (PA)      | 100   | -         | 45.45 | 54.<br>55 |
| <b>MKLGQHVLPK</b>             | 0.44<br>2 | 0.201473  | 0.494 | 0.4918<br>2674 | 0.2291<br>2064 | 729.2  | -0,18 | 0,58 | Good | 10<br>,0<br>2 | 2,5 | 0,91 | 6 - 9 (NI)      | 100   | -         | -     | 100       |
| <b>SEDFGVNENL<br/>ADSDAVG</b> | 0.44<br>4 | 0.195115  | 0.481 | 0.3985<br>2968 | 0.1996<br>7    | 775.0  | -0,13 | 0,66 | Good | 3,<br>34      | -5  | 0,45 | 4 - 7 (NI)      | 100   | -         | -     | 100       |
| <b>VVDLMAHMA<br/>SK</b>       | 0.53<br>8 | 0.188979  | 0.561 | 0.4488<br>796  | 0.2450<br>6909 | 769.6  | 0,01  | 0,59 | Poor | 7,<br>09      | 0,5 | 0,47 | 1 - 5 (NI)      | 100   | 72.7<br>3 | -     | 27.<br>27 |
| <b>DNLQGLTKLP<br/>AR</b>      | 0.44<br>1 | 0.274568  | 0.481 | 0.3430<br>9    | 0.2172<br>4695 | 699.0  | -0,26 | 0,6  | Good | 9,<br>1       | 1   | 0,61 | 6 - 9 (NI)      | 100   | -         | -     | 100       |
| <b>AAVEEGVVA<br/>GGRALVAV</b> | 0.47<br>4 | 0.215247  | 0.502 | 0.3797<br>1625 | 0.1742<br>7    | 745.5  | 0,12  | 0,63 | Poor | 4,<br>54      | -1  | 0,29 | 14 - 17<br>(NI) | 82.35 | -         | 35.29 | 64.<br>71 |
| <b>ANKGSFVKLL</b>             | 0.47<br>3 | 0.515945  | 0.554 | 0.3319<br>3    | 0.1932<br>9    | 725.0  | -0,05 | 0,63 | Good | 10<br>,0<br>2 | 2   | 0,73 | 6 - 10 (NI)     | 100   | 10.0<br>0 | 20.00 | 70.<br>00 |
| <b>YEELQSLQK</b>              | 0.51<br>1 | 0.0589363 | 0.586 | 0.3567<br>7    | 0.2601<br>7243 | 787.5  | -0,32 | 0,63 | Good | 4,<br>54      | -1  | 0,97 | 4 - 7 (NI)      | 100   | 66.6<br>7 | -     | 33.<br>33 |
| <b>FESEVYLLSK</b>             | 0.47<br>0 | 0.225631  | 0.589 | 0.4325<br>6617 | 0.1999<br>1    | 765.78 | -0,06 | 0,63 | Good | 4,<br>54      | -1  | 0,62 | 5 - 8 (NI)      | 100   | -         | 40.00 | 60.<br>00 |
| <b>HQGVVMVGM<br/>GQK</b>      | 0.50<br>6 | 0.221249  | 0.513 | 0.4063<br>1881 | 0.2056<br>7694 | 806.9  | -0,07 | 0,64 | Poor | 9,<br>11      | 1,5 | 0,69 | 4 - 8 (NI)      | 100   | -         | 27.27 | 72.<br>73 |
| <b>DSYVGNALV<br/>M</b>        | 0.46<br>6 | 0.26744   | 0.629 | 0.3877<br>3027 | 0.2288<br>3895 | 771.8  | 0,01  | 0,67 | Poor | 3,<br>67      | -2  | 0,12 | 8 - 11 (NI)     | 100   | -         | -     | 100       |
| <b>RVTVHGANG<br/>LQLPTF</b>   | 0.34<br>7 | 0.216065  | 0.403 | 0.5446<br>0669 | 0.2556<br>0895 | 790.0  | -0,04 | 0,57 | Poor | 10<br>,1<br>1 | 1,5 | 0,34 | 2 - 5 (NI)      | 100   | -         | 13.33 | 86.<br>67 |
| <b>LETLEVNSGC<br/>L</b>       | 0.52<br>3 | 0.163622  | 0.538 | 0.3043<br>8563 | 0.2224<br>9383 | 740.5  | 0     | 0,62 | Good | 3,<br>8       | -2  | 0,23 | 6 - 11 (NI)     | 100   | -         | 18.18 | 81.<br>82 |
| <b>VLLAAHGNSL<br/>R</b>       | 0.47<br>7 | 0.251137  | 0.532 | 0.4776<br>0406 | 0.2477<br>5901 | 751.1  | -0,02 | 0,54 | Poor | 10<br>,1<br>1 | 1,5 | 0,35 | 1 - 4 (NI)      | 100   | -         | 18.18 | 81.<br>82 |
| <b>FEELGGADLG<br/>FV</b>      | 0.42<br>7 | 0.488262  | 0.469 | 0.4046<br>4604 | 0.2072<br>1523 | 796.36 | 0,13  | 0,65 | Good | 3,<br>58      | -3  | 0,21 | 9 - 12 (NI)     | 100   | -         | -     | 100       |
| <b>LAQANGWLN<br/>SASRH</b>    | 0.49<br>4 | 0.427648  | 0.452 | 0.3979<br>3226 | 0.1982<br>1    | 768.23 | -0,17 | 0,55 | Poor | 10<br>,1<br>1 | 1,5 | 0,37 | 7 - 10 (NI)     | 100   | 42.8<br>6 | -     | 57.<br>14 |
| <b>DVKESNAKTE<br/>PAL</b>     | 0.42<br>5 | 0.125147  | 0.534 | 0.3154<br>1    | 0.2347<br>3744 | 778.08 | -0,29 | 0,61 | Good | 4,<br>68      | -1  | 0,76 | 2 - 5 (NI)      | 100   | -         | -     | 100       |
| <b>VFLQNVLGV</b>              | 0.38<br>5 | 0.240594  | 0.504 | 0.3794<br>2806 | 0.1997<br>5    | 768.88 | 0,24  | 0,66 | Poor | 5,<br>88      | 0   | 0,14 | 1 - 9 (PA)      | 100   | 44.4<br>4 | -     | 55.<br>56 |
| <b>MLKGKKVSW</b>              | 0.45<br>8 | 0.196316  | 0.475 | 0.2867<br>6    | 0.1649<br>3    | 682.38 | -0,19 | 0,64 | Good | 10<br>,3<br>1 | 3   | 1,22 | 5 - 9 (NI)      | 100   | -         | -     | 100       |

|                   |      |           |       |        |        |        |       |      |      |    |     |      |             |     |      |       |     |
|-------------------|------|-----------|-------|--------|--------|--------|-------|------|------|----|-----|------|-------------|-----|------|-------|-----|
| <b>LLNEPTAAAL</b> | 0.56 | 0.766049  | 0.554 | 0.3192 | 0.2433 | 757.33 | 0,14  | 0,59 | Poor | 4  | -1  | 0,08 | 13 - 16     | 100 | 62.5 | -     | 37. |
| <b>GNFMML</b>     | 8    |           |       | 0      | 082    |        |       |      |      |    |     |      | (NI)        |     |      |       | 5   |
| <b>LLDSVGLEMT</b> | 0.48 | 0.150938  | 0.501 | 0.4079 | 0.2163 | 801.69 | 0,03  | 0,62 | Good | 3, | -3  | 0,18 | 1 - 5 (NI)  | 100 | -    | -     | 100 |
| <b>GGPE</b>       | 3    |           |       | 3148   | 6893   |        |       |      |      | 58 |     |      |             |     |      |       |     |
| <b>NPDDLTTQQY</b> | 0.49 | 0.256997  | 0.454 | 0.4580 | 0.2045 | 783.53 | -0,15 | 0,64 | Poor | 3, | -2  | 0,23 | 10 - 14     | 100 | 56.2 | 6.25  | 37. |
| <b>SVFFSG</b>     | 7    |           |       | 8849   | 0      |        |       |      |      | 57 |     |      | (NI)        |     | 5    |       | 50  |
| <b>ADLLGGNLSL</b> | 0.58 | 0.384925  | 0.524 | 0.3729 | 0.2143 | 762.25 | 0,04  | 0,6  | Poor | 6, | 0   | 0,28 | 7 - 10 (NI) | 100 | 15.3 | -     | 84. |
| <b>AAK</b>        | 8    |           |       | 9588   | 0607   |        |       |      |      | 19 |     |      |             |     | 8    |       | 62  |
| <b>DSTLLMQLGL</b> | 0.59 | 0.352087  | 0.566 | 0.3328 | 0.2768 | 768.2  | 0,11  | 0,62 | Poor | 3, | -1  | 0,11 | 3 - 11 (NI) | 100 | 54.5 | -     | 45. |
| <b>V</b>          | 8    |           |       | 4      | 037    |        |       |      |      | 8  |     |      |             |     | 5    |       | 45  |
| <b>WVFPAGGK</b>   | 0.51 | 0.552931  | 0.545 | 0.4992 | 0.2610 | 784.6  | 0,12  | 0,61 | Poor | 9, | 1   | 0,45 | 1 - 4 (PA)  | 100 | -    | 9.09  | 90. |
| <b>QL</b>         | 5    |           |       | 9824   | 3133   |        |       |      |      | 11 |     |      |             |     |      |       | 91  |
| <b>VDFLPAAGAF</b> | 0.44 | 0.829948  | 0.51  | 0.4668 | 0.2783 | 807.55 | 0,24  | 0,57 | Poor | 3, | -1  | 0    | 1 - 4 (NI)  | 100 | -    | -     | 100 |
| <b>LP</b>         | 8    |           |       | 1398   | 0237   |        |       |      |      | 8  |     |      |             |     |      |       |     |
| <b>LLPAYSNSPK</b> | 0.44 | 0.432078  | 0.575 | 0.4568 | 0.2354 | 745.25 | 0     | 0,56 | Poor | 8, | 1   | 0,28 | 10 - 13     | 100 | -    | -     | 100 |
| <b>LLY</b>        | 1    |           |       | 2043   | 1372   |        |       |      |      | 83 |     |      | (NI)        |     |      |       |     |
| <b>FLANVSTVLG</b> | 0.43 | 0.502157  | 0.585 | 0.3403 | 0.1832 | 763.18 | 0,1   | 0,64 | Poor | 9, | 1   | 0,31 | 1 - 9 (PA)  | 100 | 50.0 | -     | 50. |
| <b>MK</b>         | 6    |           |       | 2      | 6      |        |       |      |      | 11 |     |      |             |     | 0    |       | 00  |
| <b>LGSGVLLVGN</b> | 0.45 | 0.377937  | 0.58  | 0.3992 | 0.1987 | 773.7  | 0,2   | 0,61 | Poor | 5, | 0   | 0    | 5 - 8 (PA)  | 100 | -    | 36.36 | 63. |
| <b>P</b>          | 5    |           |       | 5662   | 2      |        |       |      |      | 88 |     |      |             |     |      |       | 64  |
| <b>VFLQNVVAV</b>  | 0.35 | 0.105802  | 0.444 | 0.3658 | 0.1993 | 771.25 | 0,25  | 0,67 | Poor | 5, | 0   | 0,14 | 1 - 9 (PA)  | 100 | -    | 22.22 | 77. |
| <b>D</b>          | 0    |           |       | 5      | 0      |        |       |      |      | 88 |     |      |             |     |      |       | 78  |
| <b>LDTLELLTVG</b> | 0.57 | 0.0772192 | 0.507 | 0.3362 | 0.2414 | 767.9  | 0,04  | 0,61 | Good | 3, | -3  | 0,12 | 6 - 9 (NI)  | 100 | -    | 45.45 | 54. |
| <b>D</b>          | 1    |           |       | 1      | 7359   |        |       |      |      | 5  |     |      |             |     |      |       | 55  |
| <b>LVSWSYNGGE</b> | 0.36 | 0.164485  | 0.511 | 0.4981 | 0.1515 | 803.93 | -0,12 | 0,64 | Poor | 6, | 0   | 0,33 | 1 - 5 (NI)  | 100 | -    | -     | 100 |
| <b>TGYSNK</b>     | 3    |           |       | 3297   | 1      |        |       |      |      | 35 |     |      |             |     |      |       |     |
| <b>YKPLDLRKP</b>  | 0.46 | 0.433393  | 0.511 | 0.3292 | 0.2252 | 788.75 | -0,42 | 0,59 | Good | 9, | 2   | 1,09 | 4 - 7 (NI)  | 100 | -    | -     | 100 |
| <b>DAL</b>        | 0    |           |       | 6      | 1567   |        |       |      |      | 72 |     |      |             |     |      |       |     |
| <b>EAMEDGELD</b>  | 0.36 | 0.0993575 | 0.414 | 0.3533 | 0.2220 | 714.0  | -0,17 | 0,66 | Good | 3, | -6  | 0,32 | 8 - 12 (NI) | 100 | -    | -     | 100 |
| <b>DAL</b>        | 2    |           |       | 8      | 5411   |        |       |      |      | 3  |     |      |             |     |      |       |     |
| <b>WLYNNGRTP</b>  | 0.57 | 0.425919  | 0.628 | 0.4359 | 0.1814 | 799.82 | -0,05 | 0,61 | Poor | 9, | 1   | 0,2  | 1 - 4 (NI)  | 100 | -    | -     | 100 |
| <b>LVL</b>        | 9    |           |       | 6399   | 8      |        |       |      |      | 1  |     |      |             |     |      |       |     |
| <b>LVSHPACV</b>   | 0.49 | 0.593501  | 0.546 | 0.5154 | 0.2570 | 800.82 | 0,15  | 0,51 | Poor | 7, | 0,5 | 0,12 | 9 - 12 (NI) | 100 | -    | -     | 100 |
| <b>TF</b>         | 5    |           |       | 3415   | 3362   |        |       |      |      | 06 |     |      |             |     |      |       |     |
| <b>LNFSHASHEY</b> | 0.44 | 0.180224  | 0.469 | 0.5810 | 0.2331 | 718.93 | -0,17 | 0,49 | Good | 6, | 0,5 | 0,66 | 5 - 11 (NI) | 100 | 31.2 | -     | 68. |
| <b>HAETKL</b>     | 7    |           |       | 4032   | 9894   |        |       |      |      | 3  |     |      |             |     | 5    |       | 75  |
| <b>GLFPSLVGRP</b> | 0.49 | 0.794303  | 0.565 | 0.3874 | 0.2278 | 794.6  | -0,13 | 0,58 | Good | 12 | 2   | 0,45 | 5 - 8 (NI)  | 100 | -    | -     | 100 |
| <b>R</b>          | 9    |           |       | 2959   | 8262   |        |       |      |      | ,0 |     |      |             |     |      |       |     |
| <b>LAVNMVAQA</b>  | 0.47 | 0.143183  | 0.515 | 0.3357 | 0.2044 | 747.0  | 0,11  | 0,64 | Poor | 5, | 0   | 0,11 | 1 - 6 (NI)  | 100 | 54.5 | -     | 45. |
| <b>NL</b>         | 1    |           |       | 8      | 3      |        |       |      |      | 88 |     |      |             |     | 5    |       | 45  |
| <b>YVDGPKLLY</b>  | 0.41 | 0.372362  | 0.562 | 0.4512 | 0.2213 | 759.38 | -0,01 | 0,63 | Poor | 6, | 0   | 0,41 | 6 - 9 (NI)  | 100 | -    | -     | 100 |
| <b>VFVPEVPKT</b>  | 0.45 | 0.186681  | 0.515 | 0.4340 | 0.2135 | 799.0  | 0,02  | 0,6  | Good | 6, | 0   | 0,55 | 1 - 4 (NI)  | 100 | -    | -     | 100 |
| <b>3</b>          | 3    |           |       | 7851   | 7945   |        |       |      |      | 35 |     |      |             |     |      |       |     |

|                   |      |          |       |        |        |        |       |      |      |    |      |      |             |       |      |       |     |
|-------------------|------|----------|-------|--------|--------|--------|-------|------|------|----|------|------|-------------|-------|------|-------|-----|
| <b>FVTSWTGGQ</b>  | 0.49 | 0.104821 | 0.5   | 0.4835 | 0.2353 | 793.0  | 0,03  | 0,61 | Poor | 5, | 0    | 0,19 | 1 - 6 (NI)  | 100   | -    | -     | 100 |
| <b>ASQV</b>       | 8    |          |       | 1473   | 3818   |        |       |      |      | 88 |      |      |             |       |      |       |     |
| <b>SSGPYGGGHT</b> | 0.36 | 0.304952 | 0.461 | 0.5788 | 0.2166 | 764.85 | -0,19 | 0,57 | Good | 7, | 0,5  | 0,55 | 9 - 12 (NI) | 100   | -    | -     | 100 |
| <b>QEAK</b>       | 2    |          |       | 0718   | 0797   |        |       |      |      | 1  |      |      |             |       |      |       |     |
| <b>SSFYVNGLT</b>  | 0.42 | 0.313953 | 0.453 | 0.4027 | 0.1892 | 730.69 | -0,03 | 0,64 | Poor | 8, | 1    | 0,35 | 3 - 10 (NI) | 100   | -    | 21.43 | 78. |
| <b>GGQK</b>       | 1    |          |       | 4075   | 7      |        |       |      |      | 94 |      |      |             |       |      |       | 57  |
| <b>FPGQLANDRL</b> | 0.36 | 0.690445 | 0.448 | 0.3654 | 0.2440 | 769.0  | -0,18 | 0,62 | Good | 6, | 0    | 0,37 | 4 - 7 (NI)  | 100   | -    | -     | 100 |
|                   | 6    |          |       | 7      | 286    |        |       |      |      | 19 |      |      |             |       |      |       |     |
| <b>LLSWYNNEFG</b> | 0.44 | 0.392721 | 0.476 | 0.4970 | 0.2119 | 821.67 | 0     | 0,57 | Poor | 5, | -0,5 | 0,17 | 1 - 5 (NI)  | 100   | 6.25 | -     | 93. |
| <b>GHAPGT</b>     | 4    |          |       | 5651   | 088    |        |       |      |      | 25 |      |      |             |       |      |       | 75  |
| <b>EHALLAYTVA</b> | 0.50 | 0.295266 | 0.575 | 0.4466 | 0.1824 | 756.55 | 0,05  | 0,55 | Poor | 7, | 0,5  | 0,53 | 4 - 11 (PA) | 50.00 | -    | 58.33 | 41. |
| <b>VK</b>         | 3    |          |       | 9354   | 2      |        |       |      |      | 1  |      |      |             |       |      |       | 67  |
| <b>YLSPKLADM</b>  | 0.47 | 0.347789 | 0.585 | 0.2831 | 0.1970 | 755.45 | -0,27 | 0,61 | Good | 6, | 0    | 0,51 | 9 - 12 (NI) | 100   | 58.3 | -     | 41. |
| <b>TR</b>         | 2    |          |       | 6      | 4      |        |       |      |      | 31 |      |      |             |       | 3    |       | 67  |
| <b>EEASNYLENK</b> | 0.51 | 0.111459 | 0.561 | 0.4344 | 0.1767 | 766.17 | -0,41 | 0,63 | Good | 4, | -1   | 0,76 | 4 - 7 (NI)  | 100   | 69.2 | -     | 30. |
| <b>ATR</b>        | 8    |          |       | 0059   | 3      |        |       |      |      | 79 |      |      |             |       | 3    |       | 77  |
| <b>VLGSGCNLDS</b> | 0.40 | 0.326825 | 0.49  | 0.3608 | 0.1946 | 756.73 | -0,12 | 0,63 | Good | 6, | 0    | 0,2  | 1 - 4 (NI)  | 100   | -    | -     | 100 |
| <b>AR</b>         | 3    |          |       | 7      | 6      |        |       |      |      | 16 |      |      |             |       |      |       |     |
| <b>HLQYELLK</b>   | 0.52 | 0.309696 | 0.619 | 0.4746 | 0.2079 | 725.25 | -0,07 | 0,54 | Poor | 7, | 0,5  | 0,85 | 5 - 9 (NI)  | 100   | 11.1 | 33.33 | 55. |
|                   | 7    |          |       | 4412   | 6      |        |       |      |      | 1  |      |      |             |       | 1    |       | 56  |
| <b>LAEGSFVKLL</b> | 0.47 | 0.516527 | 0.578 | 0.3746 | 0.2187 | 708.33 | 0,12  | 0,61 | Poor | 6, | 0    | 0,49 | 6 - 10 (NI) | 100   | 10.0 | 20.00 | 70. |
|                   | 5    |          |       | 3      | 428    |        |       |      |      | 35 |      |      |             |       | 0    |       | 00  |
| <b>LSAKAGCVPA</b> | 0.40 | 0.539657 | 0.515 | 0.3969 | 0.2074 | 797.92 | 0,08  | 0,56 | Poor | 8, | 1    | 0,28 | 5 - 8 (NI)  | 100   | -    | -     | 100 |
| <b>YPL</b>        | 1    |          |       | 5      | 9      |        |       |      |      | 54 |      |      |             |       |      |       |     |
| <b>FDVFGLEFGY</b> | 0.50 | 0.511375 | 0.449 | 0.4906 | 0.2411 | 789.0  | 0,08  | 0,68 | Good | 3, | -4   | 0,1  | 3 - 6 (NI)  | 100   | -    | 38.46 | 61. |
| <b>DDL</b>        | 3    |          |       | 3924   | 1372   |        |       |      |      | 38 |      |      |             |       |      |       | 54  |
| <b>YYVTLLDAHG</b> | 0.41 | 0.229052 | 0.589 | 0.4406 | 0.2187 | 712.45 | -0,09 | 0,56 | Poor | 7, | 0,5  | 0,33 | 1 - 6 (NI)  | 100   | -    | 33.33 | 66. |
| <b>PR</b>         | 2    |          |       | 2093   | 5469   |        |       |      |      | 09 |      |      |             |       |      |       | 67  |
| <b>EHALLAYTGL</b> | 0.48 | 0.295266 | 0.575 | 0.4788 | 0.1893 | 759.91 | 0,04  | 0,55 | Poor | 7, | 0,5  | 0,53 | 4 - 11 (NI) | 91.66 | 41.6 | -     | 58. |
| <b>VK</b>         | 3    |          |       | 6872   | 6      |        |       |      |      | 1  |      |      |             |       | 7    |       | 33  |
| <b>LTLPVDFVSN</b> | 0.44 | 0.197915 | 0.527 | 0.3011 | 0.2154 | 787.09 | 0,1   | 0,6  | Poor | 3, | -1   | 0    | 5 - 12 (NI) | 100   | -    | -     | 100 |
| <b>TL</b>         | 7    |          |       | 4      | 0612   |        |       |      |      | 8  |      |      |             |       |      |       |     |
| <b>YASSANLHLP</b> | 0.42 | 0.307092 | 0.463 | 0.4217 | 0.2539 | 737.4  | -0,07 | 0,51 | Poor | 7, | 0,5  | 0,25 | 6 - 9 (NI)  | 100   | -    | -     | 100 |
| <b>Q</b>          | 7    |          |       | 1109   | 3876   |        |       |      |      | 09 |      |      |             |       |      |       |     |
| <b>LDADLALVN</b>  | 0.59 | 0.189191 | 0.451 | 0.3169 | 0.2238 | 738.93 | 0,05  | 0,63 | Good | 3, | -4   | 0,16 | 6 - 12 (PA) | 100   | 68.7 | -     | 31. |
| <b>VLEVGS</b>     | 5    |          |       | 1      | 1406   |        |       |      |      | 44 |      |      |             |       | 5    |       | 25  |
| <b>VNQGVWVNA</b>  | 0.52 | 0.279905 | 0.516 | 0.4434 | 0.1940 | 712.0  | 0,1   | 0,65 | Poor | 5, | 0    | 0,12 | 1 - 10 (NI) | 100   | -    | 20.00 | 80. |
| <b>L</b>          | 8    |          |       | 1302   | 0      |        |       |      |      | 88 |      |      |             |       |      |       | 00  |
| <b>LGDLYEEM</b>   | 0.35 | 0.245589 | 0.424 | 0.4712 | 0.1922 | 743.67 | -0,28 | 0,67 | Good | 4, | -3   | 0,63 | 1 - 5 (NI)  | 100   | 50.0 | -     | 50. |
| <b>R</b>          | 5    |          |       | 7339   | 6      |        |       |      |      | 01 |      |      |             |       | 0    |       | 00  |
| <b>KTSKFTGGNT</b> | 0.40 | 0.196156 | 0.5   | 0.3279 | 0.2175 | 784.0  | -0,2  | 0,62 | Good | 10 | 2    | 0,67 | 2 - 6 (NI)  | 100   | -    | -     | 100 |
| <b>L</b>          | 3    |          |       | 1      | 0008   |        |       |      |      | ,0 |      |      |             |       |      |       |     |
|                   |      |          |       |        |        |        |       |      |      | 2  |      |      |             |       |      |       |     |
| <b>LAEPDNRLQ</b>  | 0.36 | 0.275858 | 0.566 | 0.4100 | 0.2790 | 730.38 | -0,35 | 0,61 | Good | 4, | -1   | 0,55 | 6 - 9 (NI)  | 100   | -    | -     | 100 |
|                   | 0    |          |       | 6991   | 1989   |        |       |      |      | 38 |      |      |             |       |      |       |     |

|                         |      |           |       |        |        |        |       |      |      |    |     |      |              |     |      |       |     |
|-------------------------|------|-----------|-------|--------|--------|--------|-------|------|------|----|-----|------|--------------|-----|------|-------|-----|
| <b>LVNQLHTPQL</b>       | 0.44 | 0.167144  | 0.494 | 0.4960 | 0.2727 | 735.0  | -0,05 | 0,53 | Poor | 7, | 0,5 | 0,4  | 1 - 5 (NI)   | 100 | -    | -     | 100 |
|                         | 1    |           |       | 7328   | 3604   |        |       |      |      | 1  |     |      |              |     |      |       |     |
| <b>LDLDSPPLEAK</b>      | 0.50 | 0.28009   | 0.587 | 0.4075 | 0.3091 | 765.2  | -0,16 | 0,57 | Good | 4, | -2  | 0,45 | 1 - 4 (NI)   | 100 | -    | -     | 100 |
|                         | 6    |           |       | 8124   | 1446   |        |       |      |      | 03 |     |      |              |     |      |       |     |
| <b>AFDQLNNAPEEK</b>     | 0.45 | 0.180533  | 0.521 | 0.4105 | 0.2663 | 820.0  | -0,29 | 0,64 | Good | 4, | -2  | 0,62 | 5 - 8 (NI)   | 100 | 16.6 | -     | 83. |
|                         | 9    |           |       | 5897   | 8427   |        |       |      |      | 14 |     |      |              |     | 7    |       | 33  |
| <b>VPHFNSKATF</b>       | 0.48 | 0.507392  | 0.552 | 0.3619 | 0.2515 | 776.22 | -0,06 | 0,55 | Poor | 9, | 1,5 | 0,51 | 3 - 6 (NI)   | 100 | -    | -     | 100 |
|                         | 5    |           |       | 5      | 0704   |        |       |      |      | 11 |     |      |              |     |      |       |     |
| <b>KNEQLVQPLL SK</b>    | 0.54 | 0.17638   | 0.554 | 0.3508 | 0.2318 | 780.82 | -0,25 | 0,61 | Good | 8, | 1   | 0,93 | 9 - 12 (NI)  | 100 | 66.6 | -     | 33. |
|                         | 2    |           |       | 8      | 1403   |        |       |      |      | 94 |     |      |              |     | 7    |       | 33  |
| <b>VVDENGNSVFNATVA</b>  | 0.43 | 0.138989  | 0.522 | 0.3489 | 0.1694 | 792.2  | -0,01 | 0,67 | Poor | 3, | -2  | 0,08 | 9 - 15 (NI)  | 100 | -    | -     | 100 |
|                         | 4    |           |       | 4      | 0      |        |       |      |      | 67 |     |      |              |     |      |       |     |
| <b>VDSLLEAAKDV</b>      | 0.51 | 0.0768952 | 0.523 | 0.3284 | 0.2789 | 758.4  | -0,07 | 0,63 | Good | 4, | -2  | 0,45 | 1 - 5 (NI)   | 100 | 72.7 | -     | 27. |
|                         | 9    |           |       | 2      | 4446   |        |       |      |      | 03 |     |      |              |     | 3    |       | 27  |
| <b>VFLGNLGLSAVKV</b>    | 0.53 | 0.256565  | 0.434 | 0.3920 | 0.2020 | 801.67 | 0,18  | 0,63 | Poor | 9, | 1   | 0,28 | 1 - 13 (NI)  | 100 | -    | -     | 100 |
|                         | 0    |           |       | 5024   | 4      |        |       |      |      | 11 |     |      |              |     |      |       |     |
| <b>GNPQNAAKQS Q</b>     | 0.36 | 0.111204  | 0.504 | 0.3517 | 0.2591 | 765.0  | -0,37 | 0,62 | Good | 9, | 1   | 0,67 | 8 - 11 (NI)  | 100 | 63.6 | -     | 36. |
|                         | 9    |           |       | 8891   | 9238   |        |       |      |      | 11 |     |      |              |     | 4    |       | 36  |
| <b>PMFLVNTNVR P</b>     | 0.48 | 0.278401  | 0.605 | 0.3995 | 0.2384 | 757.9  | -0,08 | 0,62 | Poor | 10 | 1   | 0,22 | 2 - 9 (PA)   | 100 | -    | 27.27 | 72. |
|                         | 6    |           |       | 1459   | 7045   |        |       |      |      | ,1 |     |      |              |     |      |       | 73  |
|                         |      |           |       |        |        |        |       |      |      | 1  |     |      |              |     |      |       |     |
| <b>ADVFPVVKTP</b>       | 0.41 | 0.252916  | 0.491 | 0.4652 | 0.2326 | 798.6  | -0,03 | 0,61 | Good | 4, | -1  | 0,45 | 7 - 10 (NI)  | 100 | -    | -     | 100 |
|                         | 5    |           |       | 952    | 0595   |        |       |      |      | 38 |     |      |              |     |      |       |     |
| <b>VNRAMTLPLL</b>       | 0.58 | 0.46569   | 0.642 | 0.3730 | 0.2224 | 648.67 | 0     | 0,59 | Poor | 10 | 1   | 0,25 | 1 - 7 (NI)   | 100 | -    | -     | 100 |
|                         | 4    |           |       | 1007   | 0958   |        |       |      |      | ,1 |     |      |              |     |      |       |     |
|                         |      |           |       |        |        |        |       |      |      | 1  |     |      |              |     |      |       |     |
| <b>YALYNTFSQMV</b>      | 0.40 | 0.36646   | 0.513 | 0.4044 | 0.1921 | 809.1  | 0,04  | 0,65 | Poor | 5, | 0   | 0,11 | 3 - 11 (NI)  | 100 | 63.6 | -     | 36. |
|                         | 8    |           |       | 781    | 5      |        |       |      |      | 87 |     |      |              |     | 4    |       | 36  |
| <b>LNNPDSDF AAPQ</b>    | 0.38 | 0.32322   | 0.529 | 0.3030 | 0.2629 | 808.31 | -0,14 | 0,59 | Good | 3, | -2  | 0,09 | 9 - 12 (NI)  | 100 | -    | -     | 100 |
|                         | 8    |           |       | 4      | 3203   |        |       |      |      | 57 |     |      |              |     |      |       |     |
| <b>VLAGLKQELTNL</b>     | 0.51 | 0.189908  | 0.54  | 0.3475 | 0.1879 | 768.0  | -0,01 | 0,61 | Poor | 6, | 0   | 0,52 | 1 - 5 (NI)   | 100 | 75.0 | -     | 25. |
|                         | 2    |           |       | 8      | 5      |        |       |      |      | 35 |     |      |              |     | 0    |       | 00  |
| <b>SGGGGGGGL GNSRLS</b> | 0.33 | 0.752894  | 0.425 | 0.4830 | 0.1973 | 812.79 | -0,06 | 0,64 | Good | 10 | 1   | 0,16 | 11 - 14 (NI) | 100 | -    | -     | 100 |
|                         | 6    |           |       | 7428   | 327    |        |       |      |      | ,1 |     |      |              |     |      |       |     |
|                         |      |           |       |        |        |        |       |      |      | 1  |     |      |              |     |      |       |     |
| <b>ANKGFVSVKLL</b>      | 0.47 | 0.534877  | 0.571 | 0.3189 | 0.1951 | 754.33 | -0,05 | 0,63 | Good | 10 | 2   | 0,73 | 5 - 10 (NI)  | 100 | -    | 30.00 | 70. |
|                         | 2    |           |       | 2      | 0      |        |       |      |      | ,0 |     |      |              |     |      |       | 00  |
|                         |      |           |       |        |        |        |       |      |      | 2  |     |      |              |     |      |       |     |
| <b>VCENLPLVLP YAGA</b>  | 0.44 | 0.501232  | 0.548 | 0.3592 | 0.2154 | 824.23 | 0,14  | 0,58 | Poor | 4  | -1  | 0,09 | 1 - 5 (NI)   | 100 | -    | -     | 100 |
|                         | 4    |           |       | 5651   | 7621   |        |       |      |      |    |     |      |              |     |      |       |     |
| <b>MLGKPDCLKL APL</b>   | 0.53 | 0.596945  | 0.534 | 0.3307 | 0.2257 | 761.0  | -0,02 | 0,58 | Good | 8, | 1   | 0,61 | 7 - 10 (NI)  | 100 | -    | -     | 100 |
|                         | 4    |           |       | 0      | 2958   |        |       |      |      | 94 |     |      |              |     |      |       |     |
| <b>LNVYYNMPGLE</b>      | 0.49 | 0.403534  | 0.568 | 0.5855 | 0.1740 | 727.9  | 0,01  | 0,65 | Poor | 4  | -1  | 0,12 | 1 - 7 (NI)   | 100 | -    | 27.27 | 72. |
|                         | 3    |           |       | 1896   | 6      |        |       |      |      |    |     |      |              |     |      |       | 73  |
| <b>LEGLTNELNF GVL</b>   | 0.48 | 0.405265  | 0.528 | 0.3292 | 0.2244 | 790.58 | 0,07  | 0,64 | Poor | 3, | -2  | 0,2  | 8 - 13 (NI)  | 100 | -    | -     | 100 |
|                         | 0    |           |       | 4      | 3792   |        |       |      |      | 8  |     |      |              |     |      |       |     |

|                              |           |           |       |                |                |        |       |      |      |              |      |      |             |     |           |       |           |
|------------------------------|-----------|-----------|-------|----------------|----------------|--------|-------|------|------|--------------|------|------|-------------|-----|-----------|-------|-----------|
| <b>DVKESDASPT<br/>Q</b>      | 0.40<br>5 | 0.0670719 | 0.556 | 0.2981<br>1    | 0.2205<br>8594 | 813.3  | -0,35 | 0,61 | Good | 4,<br>03     | -2   | 0,56 | 2 - 5 (NI)  | 100 | -         | -     | 100       |
| <b>STGGAPTMTK<br/>TKV</b>    | 0.37<br>5 | 0.145128  | 0.456 | 0.3152<br>8    | 0.2060<br>8586 | 755.69 | -0,15 | 0,59 | Good | 10<br>0<br>2 | 2    | 0,52 | 8 - 14 (NI) | 100 | -         | -     | 100       |
| <b>DSLLQDGEFS<br/>SVSNQ</b>  | 0.31<br>4 | 0.171443  | 0.441 | 0.3392<br>8    | 0.2072<br>4934 | 733.21 | -0,18 | 0,64 | Good | 3,<br>5      | -3   | 0,25 | 9 - 12 (NI) | 100 | -         | -     | 100       |
| <b>VLLGGGNPLT<br/>LEAGFR</b> | 0.54<br>2 | 0.509016  | 0.604 | 0.4367<br>286  | 0.2054<br>2    | 792.0  | 0,06  | 0,61 | Poor | 6,<br>36     | 0    | 0,23 | 1 - 4 (NI)  | 100 | 18.7<br>5 | -     | 81.<br>25 |
| <b>VPTANVSVVD<br/>HKGHA</b>  | 0.28<br>3 | 0.121013  | 0.45  | 0.2903<br>3    | 0.1875<br>4    | 760.79 | -0,06 | 0,54 | Poor | 7,<br>26     | 1    | 0,44 | 6 - 9 (PA)  | 100 | -         | 26.67 | 73.<br>33 |
| <b>AVRLPHWNL<br/>N</b>       | 0.57<br>3 | 0.55082   | 0.535 | 0.5854<br>4934 | 0.2561<br>1389 | 789.11 | -0,13 | 0,53 | Poor | 10<br>1      | 1,5  | 0,39 | 7 - 10 (NI) | 100 | -         | -     | 100       |
| <b>DVKESDAARA<br/>D</b>      | 0.45<br>5 | 0.0717502 | 0.495 | 0.2716<br>2    | 0.2324<br>7156 | 773.0  | -0,42 | 0,65 | Good | 4,<br>23     | -2   | 0,67 | 2 - 5 (NI)  | 100 | 54.5<br>5 | -     | 45.<br>45 |
| <b>LVLANNCGG<br/>LLP</b>     | 0.50<br>5 | 0.676565  | 0.47  | 0.4567<br>0402 | 0.2411<br>7279 | 764.17 | 0,19  | 0,59 | Poor | 5,<br>85     | 0    | 0    | 1 - 4 (NI)  | 100 | -         | 30.77 | 69.<br>23 |
| <b>GMGFVDFNTP<br/>VSSGM</b>  | 0.27<br>0 | 0.514491  | 0.465 | 0.4234<br>9318 | 0.2072<br>3329 | 777.0  | 0,08  | 0,66 | Poor | 3,<br>8      | -1   | 0    | 4 - 9 (NI)  | 100 | -         | 6.67  | 93.<br>33 |
| <b>ALEPNAAGAL<br/>Q</b>      | 0.45<br>6 | 0.267449  | 0.534 | 0.4001<br>0238 | 0.2699<br>3537 | 762.5  | 0,02  | 0,57 | Poor | 4            | -1   | 0,23 | 7 - 10 (NI) | 100 | 18.1<br>8 | -     | 81.<br>82 |
| <b>LLEGENAHLT<br/>QKY</b>    | 0.55<br>0 | 0.131258  | 0.551 | 0.4861<br>8275 | 0.2647<br>8961 | 779.75 | -0,17 | 0,58 | Good | 5,<br>41     | -0,5 | 0,69 | 9 - 13 (NI) | 100 | -         | -     | 100       |
| <b>DDEVNVNGTV<br/>ELMNSP</b> | 0.40<br>6 | 0.139919  | 0.447 | 0.4383<br>6743 | 0.1855<br>7    | 696.53 | -0,16 | 0,67 | Good | 3,<br>44     | -4   | 0,16 | 4 - 10 (NI) | 100 | -         | 18.75 | 81.<br>25 |
| <b>WLLNNLGTS<br/>KP</b>      | 0.52<br>9 | 0.269886  | 0.527 | 0.4125<br>61   | 0.2267<br>6934 | 768.6  | -0,07 | 0,58 | Poor | 9,<br>11     | 1    | 0,33 | 1 - 6 (NI)  | 100 | 9.09      | -     | 90.<br>91 |
| <b>AVLDLGNNAN<br/>QL</b>     | 0.44<br>4 | 0.20335   | 0.417 | 0.3903<br>9311 | 0.3081<br>8963 | 773.18 | -0,04 | 0,64 | Poor | 3,<br>8      | -1   | 0,1  | 2 - 5 (NI)  | 100 | -         | -     | 100       |
| <b>QDFLVTQVEN<br/>EGKGSK</b> | 0.51<br>5 | 0.113151  | 0.479 | 0.3897<br>6109 | 0.1792<br>7    | 740.87 | -0,26 | 0,67 | Good | 4,<br>68     | -1   | 0,77 | 3 - 8 (NI)  | 100 | -         | 37.50 | 62.<br>50 |
| <b>VYLAQTVEY</b>             | 0.44<br>4 | 0.0487558 | 0.57  | 0.4042<br>5381 | 0.1904<br>9    | 689.0  | 0,05  | 0,64 | Poor | 4            | -1   | 0,28 | 1 - 7 (NI)  | 100 | -         | -     | 100       |

1 - PreAIP: Peptides were subjected to calculation via <http://kurata14.bio.kyutech.ac.jp/PreAIP/>, where the probability of the peptides to exert anti-inflammatory was estimated based on different types of features including primary sequence, evolutionary and structural information through a random forest classifier (threshold to be considered as highly antiinflammatory > 0,468).

2 PeptideRanker - The likelihood for the peptides as bioactive was evaluated by PeptideRanker (<http://bioware.ucd.ie/~compass/biowareweb>), a server to predict bioactive peptides based on a novel N-to-1 neural network, by giving scores ranging from 0 to 1. Higher score indicated the greater the likelihood of the peptide being bioactive.

3 PreTP-Stack: The anti-inflammatory potential of the peptides was also estimated with PreTP-Stack (<http://bliulab.net/PreTP-Stack/server>), which is based on the stacked ensemble learning, by giving scores ranging from 0 to 1. Higher score indicated the greater the likelihood of the peptide being anti-inflammatory.

4 - AnOxPePred tool (<http://services.bioinformatics.dtu.dk/service.php?AnOxPePred-1.0>) uses deep learning to predict the antioxidant properties (quantified by free radical scavenging and ion chelating scores) of peptides by giving scores ranging from 0 to 1.

5- SCMB3PP - it allows the prediction and characterization of blood-brain barrier penetrating peptides using estimated propensity scores of dipeptides, server available from here: <http://pmlabstack.pythonanywhere.com/SCMB3PP>

6 - Physico-chemical characterization was estimated with ToxinPred : via <https://webs.iiitd.edu.in/raghava/toxinpred/design.php/>

7- The web server PASTA 2.0 (<http://protein.bio.unipd.it/pasta2/>) was implicated to compute the tendency of peptide self-aggregation specific to the possible region at sequence (with the recorded number starting from N-terminus). For peptide discrimination, the optimal thresholds were switched as Top = 1 and Energy < - 5 PEU (1 PEU (Pasta Energy Unit) = 1.192 kcal/mol). NI: no amyloid predicted; PA: parallel aggregation computed. The probability of intrinsic disorder and portion of estimated secondary structure that complement the aggregation data were also reported.

All these tools were accessed on 24<sup>th</sup> November 2023 for the last time.
